1 Accumulation of ammonium owing to the metabolic imbalance of carbon  
2 and nitrogen might inhibit the central metabolism in *Methylomonas* sp.

3 ZR1

4 Wei Guo<sup>1</sup>, Ronglin He<sup>1</sup>, Yujie Zhao<sup>1</sup>, Demao Li<sup>#1</sup>

5 # corresponding author

6 1. Tianjin Key Laboratory for Industrial Biological Systems and Bioprocessing Engineering,  
7 Tianjin institute of industrial biotechnology, Chinese academy of science.

8 Mailing address: Tianjin Institute of Industrial Biotechnology, Chinese Academy of Sciences, 32  
9 West 7th Avenue, Tianjin Airport Economic Area, Tianjin 300308, China.

10 Phone: 0086-22-84861993. E-mail: li\_dm@tib.cas.cn

11

12 **Abstract:**

13 The metabolic intermediates of nitrogen source have been proved to have  
14 multiple functions on the metabolism of methanotrophs. In this study,  
15 accumulation and assimilation mechanism of the nitrate metabolic  
16 intermediate ammonium in the fast growing *Methylomonas* sp. ZR1 was  
17 analyzed. Although, nitrate salt was the best nitrogen source supporting  
18 the growth of ZR1, its metabolic intermediate ammonium would  
19 accumulate and inhibit ZR1. Kinetic studies indicated that accumulation  
20 of NH<sub>4</sub><sup>+</sup> was deduced from the imbalance of nitrogen and carbon  
21 metabolism. Compensation of carbon skeleton  $\alpha$ -keto-glutaramate could  
22 effectively relieve the inhibition of NH<sub>4</sub><sup>+</sup> to ZR1, which further approved

23 the assumption. qPCR analysis indicated a third ammonium assimilation  
24 pathway Glycine synthesis system may function in ZR1 under high  
25 ammonium tension. In the presence of ammonium, ZR1 might employ  
26 two strategies to relieve the ammonium stress, one was assimilating the  
27 excess ammonium, and another one was cutting off the nitrogen reduction  
28 reactions. Investigation of the nitrogen metabolism and its influence to  
29 the carbon metabolism is meaningful to systematically understand and  
30 control the C1 feedstock bioconversion process in methanotrophs.

31 **Importance:**

32 The nitrogen metabolism in methanotrophs has long been concerned.  
33 However, there are lots of research problems yet to be solved. In this  
34 study, the accumulation and assimilation mechanism of the nitrogen  
35 metabolic intermediate ammonium in the fast growing *Methylobacter* sp.  
36 ZR1 was analyzed. Owing to the imbalance metabolism of carbon and  
37 nitrogen source, ammonium would accumulate to high concentrations to  
38 inhibit cell growth. Compensation of carbon skeleton was an effective  
39 strategy to relieve the inhibition of  $\text{NH}_4^+$ . A third ammonium  
40 assimilation pathway related genes were proved actively expressing in  
41 ZR1 when it confronted with high ammonium tension. When confronted  
42 with ammonium tension, ZR1 might employ different strategies to  
43 relieve the ammonium stress according to the edible carbon source.  
44 Revealing the endogenous ammonium accumulation mechanism and its

45 metabolic adjustment effect on the central metabolism of methanotrophs,  
46 was meaningful to reveal the complex coordination metabolic  
47 mechanism of nitrogen and carbon in methanotrophs.

48 **Keywords:** nitrogen metabolism, ammonium, *Methylomonas*

49 **Introduction:**

50 Methanotrophs are excellent C1 compounds assimilating microorganisms,  
51 and its industrial application has a long history since 1960s. At the  
52 beginning methanotrophs were used to produce single cell protein from  
53 methane or methanol. Nowadays, with the development of biotechnology,  
54 methanotrophs were genetic modified to produce lactic acid (Henard et  
55 al., 2016; Garg et al., 2018), astaxanthin (Ye and Kelly, 2012) and  
56  $\alpha$ -hemelune (Sonntag et al., 2015) from methane. However, the slow  
57 growth nature of methanotrophs has constrained its application in  
58 industrial biotechnology.

59 Efforts to optimize fermentation technologies to improve the growth rates  
60 of methanotrophs on methane have been reported over the past years (Yu  
61 et al., 2003; Park et al., 1991b; Shah et al., 1996; Xing et al., 2006; Han et  
62 al., 2009) (Myung et al., 2016). Other factors such as the addition of  
63 citrate acid (Xing et al., 2006) and adjusting the ion concentration (Leak  
64 and Dalton, 1986) were also reported to have effect in improving the  
65 growth rate of methanotrophs from methane. These studies indicated that  
66 the growth rate of methanotrophs might be result from multi-factor

67 combined effects. Many studies have also proved that nitrogen sources  
68 have strong effect on the growth of methanotrophs. Park et al. studied  
69 several factors including the nitrogen source affected the growth of OB3b,  
70 and found that nitrate depletion was responsible for the diauxic growth  
71 pattern in the batch cultivation of OB3b in the bioreactor. However, its  
72 growth declined much with 40 mM nitrate (Park et al., 1991). Hoefman et  
73 al. found niche partitioning among methanotrophic species, with methane  
74 oxidation activity responses to changes in nitrogen content being  
75 dependent on the in situ methanotrophic community structure (Hoefman  
76 et al., 2014). Strains have developed a complex mechanism to balance the  
77 carbon and nitrogen metabolism (Commichau et al., 2006). Recent  
78 studies have shown that many rapidly proliferating cells are dependent on  
79 the nitrogen metabolic intermediate such as serine and glutamine (Yang  
80 and Vousden, 2016). These studies indicated that nitrogen and its  
81 metabolic intermediate might have multiple functions on the central  
82 metabolism of methanotrophs, and subsequently affected its growth.

83 In methanotrophs, the nitrogen metabolism has long been concerned.  
84 1983, Dalton et al. studied ammonia assimilation in the type X  
85 methanotroph *Methylococcus capsulatus* Bath, type I methanotroph,  
86 *Methylomonas methanica* S1, and the type II methanotroph,  
87 *Methylosinus trichosporium* OB3b, and found that, Bath and S1 possess  
88 both the glutamine synthase/ glutamine 2-oxo-glutarate amino transferase

89 (GS-GAGOT) and alanine dehydrogenase (ALAD) pathways for the  
90 assimilation of ammonia, but operated according to the nitrogen source  
91 (Murrellt and Dalton, 1983). Loginova NV et al. (Loginova et al., 1982)  
92 studied enzymes involved in ammonium assimilation by 15 bacterial  
93 strains of different taxonomy, and found that bacteria were found to differ  
94 in the enzymes for ammonium assimilation according to the pathways of  
95 primary C1-metabolism. Nyerges (Nyerges, 2008) assessed the  
96 differences in ammonia co-metabolism among four methanotrophs  
97 isolates, found the investigated strains exhibited different levels of  
98 ammonia and hydroxylamine oxidation, and inhibition of  
99 methane-oxidizing activity by ammonia and nitrite. Dam et al. found that  
100 ammonium induces differential expression pattern of methane and  
101 nitrogen metabolism-related gene in *Methylocystis* sp. strain SC2 (Dam et  
102 al., 2014). Kits et al. found that in *Methylomonas denitrifican*, sp. nov.  
103 type strain FJG1, methane oxidation could couple to nitrate reduction  
104 under hypoxia (Kits et al., 2015). These results revealed that nitrogen  
105 metabolism might play an important role in the global metabolism of  
106 methanotrophs, and nitrogen metabolism mechanism might be distinct  
107 among methanotrophs species.

108 In this study, the nitrogen metabolism during the cell growth of  
109 *Methylomonas* sp. ZR1 were studied at kinetic and gene expression level.  
110 It was found that, ZR1 might employ different nitrogen metabolic pattern

111 according to the edible carbon source, the nitrogen metabolic  
112 intermediate ammonium which was also identified as a growth inhibitor  
113 was found to accumulate when nitrogen sources were relative surplus in  
114 comparison with carbon sources. Carbon skeleton supplementation was  
115 found to be an efficient strategy to relieve the inhibition effect of  
116 ammonium on the growth of ZR1. qPCR analysis of the carbon and  
117 nitrogen metabolic key gene indicated the gene expression diversity when  
118 ZR1 was under the ammonium tension condition, and a third ammonia  
119 assimilation pathway were found highly expressed with methane as  
120 carbon source. All these results further indicated that ammonium might  
121 have multidimensional effect on the central metabolism of ZR1.

## 122 **Material and Methods**

### 123 **Strains and culture method**

124 *Methylomonas* sp. ZR1 was isolated by our group and deposited in China  
125 General Microbiological Culture Collection Center with the accession  
126 number CGMCC No. 9873. It can be cultivated using liquid or solid  
127 mineral medium with methane or methanol as the growth substrate. The  
128 medium used for ZR1 cultivation was nitrate mineral salts (NMS)  
129 medium (Whittenbury et al., 1970). For nitrogen source screening, NMS  
130 medium without nitrate salt was added with 1 g/l KNO<sub>3</sub>, 1 g/l NaNO<sub>3</sub>, 0.5  
131 g/l NH<sub>4</sub>Cl, 0.5 g/l (NH<sub>4</sub>)SO<sub>4</sub>, 0.5 g/l urea, 1 g/l trypton or 1 g/l yeast  
132 extract separately. Samples having no nitrogen substrate were performed

133 as control. To test the ammonium inhibition effect, ammonium chloride at  
134 different concentration were added into the NMS medium with or without  
135 1 g/l  $\text{KNO}_3$ . And for carbon skeleton compensation test, 0.1 g/l  
136 ammonium chloride with 0.3 g/l  $\alpha$ -ketoglutaramate ( $\alpha$ -KG), 0.4 g/l  
137 glutamate, 0.3g/l malic acid, or 0.3g/l pyruvate were simultaneously  
138 added into the NMS medium. ZR1 was cultured in flask or bubble  
139 column reactor according to the method described by Guo et al. (Guo et  
140 al., 2017). When using methanol as carbon source, the initial methanol  
141 concentration was 6 g/l without specific instruction. When using methane  
142 as carbon source, ZR1 was cultured in bubble column reactor for the  
143 ammonium accumulation study; and cultured in flask with gas refreshing  
144 every 12 hours for the nitrogen source screening, ammonium inhibition  
145 test and carbon skeleton replenishing study.

#### 146 **Total nitrogen and ammonium concentration analysis method**

147 Total nitrogen concentration in the fermentation broth was analyzed using  
148 the TOC/TN analyzer Multi N/C 2100s (Analytik Jena AG, German).  
149 Fermentation broth was first centrifuged, and the supernatant were diluted  
150 using ddH<sub>2</sub>O into suitable concentration for the analysis.

151 Ammonium was analyzed using the indophenol blue reaction according  
152 to the method described by Xie et al. (Xie et al., 2005). The fermentation  
153 broth was first centrifuged, and 0.1 ml of the supernatant were added with  
154 0.5ml reaction solution 1 (3.5 g phenol and 0.04 g sodium nitroprusside

155 in 100 ml ddH<sub>2</sub>O), and 0.5 ml reaction solution 2 (1.8 g sodium sodium  
156 hydroxide and 4.0 mmol sodium hypochlorite in 100 ml ddH<sub>2</sub>O ). The  
157 mixture was maintained at 37°C for 1 hour, and the absorbance of the  
158 solutions was read on a spectrophotometer at 625 nm. The concentration  
159 of the ammonium in the samples was calculated according to the  
160 calibration curve established using ammonium chloride.

### 161 **Methanol concentration**

162 Methanol concentration in the fermentation broth were measured by a GC  
163 (GC9790, Fuli Instrument, China) equipped with a flame ionization  
164 detector (FID) and a capillary column (0.25µm, 60m×0.25mm,  
165 7KG-G013-11 Zebron™, Phenomenex).

### 166 **Kinetic analysis of the carbon and nitrogen metabolism to cell growth**

167 The growth, carbon and nitrogen assimilation curve were first fitted using  
168 the logistic model in Origin 9.0. Then the simulated curve were took  
169 derivative with respect to OD<sub>600</sub> of ZR1 using the mathematic module of  
170 origin 9.0.

### 171 **qPCR analysis of expression level of the genes concerns carbon and** 172 **ammonium metabolism**

173 Strain ZR1 was initially grown up to log phase (OD<sub>600</sub> achieved 0.8) in 50  
174 ml of NMS medium in a 250 ml bottle fitted with butyl rubber septum  
175 and with 20% methane (v/v) in the headspace. For methanol as carbon  
176 sources, strains were cultured with 6 g/l methanol in 50 ml NMS medium



177 in 250 ml flask. For preparing ammonium inhibition samples, 0.1 g/l of  
178 NH<sub>4</sub>Cl were then added into the medium. For carbon compensation  
179 samples, 0.1 g/l of NH<sub>4</sub>Cl and 0.3 g/l of  $\alpha$ -keto-glutaramate ( $\alpha$ -KG)  
180 were added, and samples without any operation were performed as  
181 control. All samples were incubated for 2 hours, then, cells were collected  
182 by centrifugation and washed with TE buffer. RNA was extracted  
183 immediately using the RNAPrep Pure Cell/Bacteria Kit (Tiangen Biotech  
184 (Beijing) CO., Ltd), according to the product instructions. The extracted  
185 RNA was used as template to construct cDNA using the Takara Prime  
186 Script RTreagent Kit with gDNA Eraser (Perfect Real Time). Then genes  
187 were amplified using the SYBR Premix EX Taq kit, using Applied  
188 Biosystems 7500 fast Real-Time PCR system. Standard housekeeping  
189 gene 16S rDNA was selected as internal control gene. qPCR data  
190 obtained were analyzed using the method described by Pfaffl (Pfaffl,  
191 2001).  
192 Primers used are listed in table 1.

193 Table 1. Primers designed for qPCR

| Gene        | Forward primer       | Reverse primer       | Product length bp |
|-------------|----------------------|----------------------|-------------------|
| 16s rDNA    | ATGCAAGTCGAACGGTAGCA | AGGGCGTATGCGGTATTAGC | 125               |
| <i>glnA</i> | TGGCGTTTTCTGCCATGTTG | ACGAGTCAAGAATTCGCGGT | 185               |
| <i>gltB</i> | CGCTCTGGTTAAATCGCACG | CAACGGGATGTTGCGTTTGT | 143               |

|             |                      |                       |     |
|-------------|----------------------|-----------------------|-----|
| <i>alaD</i> | CAACAAGCATTGCGGGACAA | TCAGCTCAGAAACTGCTCCG  | 129 |
| <i>gcvT</i> | GCAGTTTCTCGCCGAGTCTA | GTAACGGTGCGGAACGAAAG  | 149 |
| <i>nir</i>  | ACCTGGATAGATGTGTGCGG | CCGCCTATGTCGCCTATCAT  | 185 |
| <i>nif</i>  | TTGCGACCCTAAAGCCGATT | TTTAACGTCGCGGTAACCCA  | 142 |
| <i>fae</i>  | GCACTATCCCTGCTGACGAA | GCGATAGCTTCTTTGGTGGC  | 124 |
| <i>hps</i>  | CACCGGTTTGGATGCACAAG | CGCCATAGATAGCAGCACCA  | 176 |
| <i>pdh</i>  | AACAGCAAATGCGTTGTCCC | CGGCAAATCACCGCCTTTAG  | 146 |
| <i>cs</i>   | ATGACCAGGACCGCGTTATC | GGGTAGCCCCGATAACAACAG | 193 |

194 All culture conditions were performed in triplicate biological replicates,  
 195 and for qPCR analysis, each biological sample was carried out in  
 196 triplicate. Raw data of the qPCR result were shown in supplementary  
 197 Table S1.

## 198 Result and discussion

199 1. Nitrogen source effect for the growth of ZR1 from methane and  
 200 methanol.

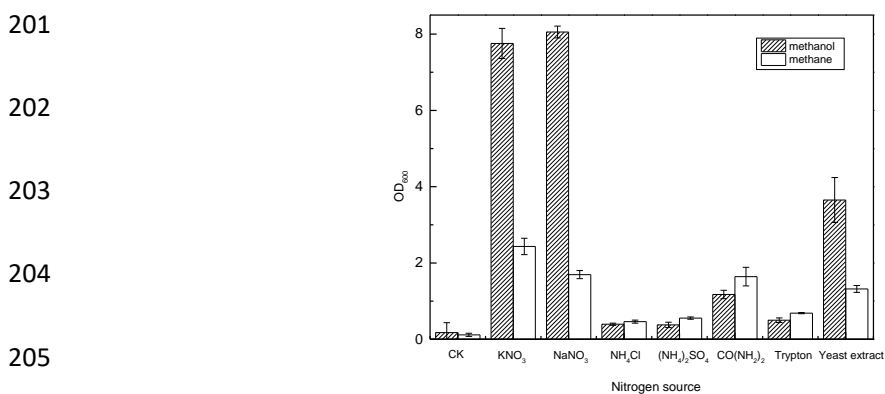

206 Figure. 1 Growth of ZR1 in the presence of different nitrogen substrate

207 from methane and methanol

208 Seven categories of nitrogen substrate were tested for the growth of ZR1

209 from both methane and methanol (Figure 1). According to Figure 1,

210 nitrate salts were the best nitrogen sources supporting the growth of ZR1

211 from both methanol and methane among the tested compounds. And the

212 growth of ZR1 from both methanol and methane with ammonium salts

213 was much weaker than from nitrate salts. Meanwhile, the effects of the

214 nitrogen sources on the growth of ZR1 from methane and methanol were

215 somewhat different. With methane as carbon sources the cell density

216 (OD<sub>600</sub>) of ZR1 achieved 2.5 with potassium nitrate, 1.8 with sodium

217 nitrate, 1.8 with urea, 1.5 with yeast extract, 0.5 with tryptone, and 0.34

218 with ammonia chloride, 0.35 from ammonia sulfate. With methanol as

219 carbon sources the cell density of ZR1 achieved 8.2 from sodium nitrate,

220 7.9 from potassium nitrate, 3.9 from yeast extract, 1.8 from urea, 0.4 from

221 tryptone, 0.35 from ammonia chloride, and 0.33 from ammonia sulfate. It

222 can be seen that nitrate salt was the most suitable nitrogen source and

223 ammonia salt could not effectively support the growth of ZR1 from

224 methane and methanol. It was generally regarded that ammonium radicals

225 were the competitive inhibitor of particular methane monooxygenase

226 (pMMO) (He et al., 2017; Hu and Lu, 2015; Dam et al., 2014; Nyerges et

227 al., 2010; Nyerges and Stein, 2009; Nyerges, 2008; Dunfield and

228 Knowles, 1995; Schnell and King, 1994; Carlsen et al., 1991; Murrellt

229 and Dalton, 1983), which will result in the lower growth of strains from  
230 methane. However, this study also proved that ammonium would hinder  
231 the growth of ZR1 from methanol, although its supposed competent  
232 object pMMO is not the key enzyme for the metabolism of methanol. It  
233 means that ammonium might have other inhibition effects for the growth  
234 of ZR1, besides its competitive inhibition effect to pMMO.  
235 2. Effect of nitrate concentration on the growth of ZR1 from methane and  
236 methanol

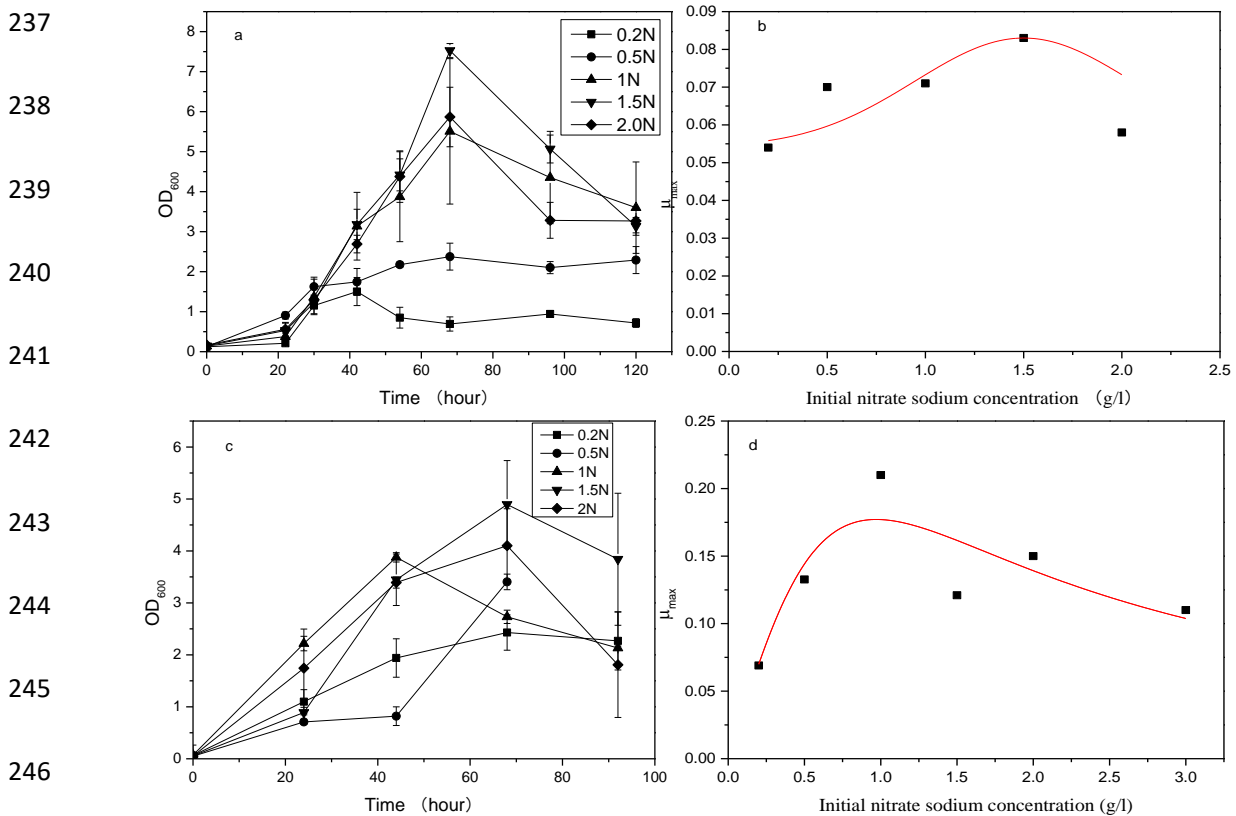

247 Figure 2. Effect of nitrate concentration on the growth of ZR1 from  
248 methane and methanol a, growth of ZR1 with different initial nitrate  
249 sodium concentration from methanol; b, specific growth rate of ZR1 with  
250 different initial nitrate concentration from methanol; c, growth of ZR1

251 with different initial nitrate sodium concentration from methane; d,  
252 specific growth rate of ZR1 with different initial nitrate concentration  
253 from methanol;

254 According to Figure 1, nitrate salts were supposed to be the most suitable  
255 nitrate source that supporting the growth of ZR1 from both methane and  
256 methanol, and effects of potassium nitrate concentration on the growth of  
257 ZR1 were investigated subsequently. According to Fig. 2, the obvious  
258 substrate inhibition effects of nitrate salts on the growth of ZR1 were  
259 investigated. The highest cell density of ZR1 achieved 7.8 with 1.5 g/l  
260 potassium nitrate (Figure 2a) . Meanwhile, Figure 2b indicated that the  
261 growth rate of ZR1 is first ascend with the increase in the substrate level  
262 and approaches a maximum value at 1.5 g/l of potassium nitrate. Then, a  
263 subsequent increase in the nitrogen concentration led to a decrease in  
264 the specific growth rate of ZR1. The situation with methane as carbon  
265 sources is similar to that of methanol. The highest cell density of ZR1  
266 achieved 4.8 with 1.5 g/l potassium nitrate (Figure 2c) , however the  
267 specific growth rate of ZR1 achieved 0.23 with 1 g/l of potassium nitrate  
268 (Figure 2d). It has been reported that growth of type II methanotrophs  
269 OB3b were also inhibited by 40 mM nitrate (4 g/l)(Park et al., 1991a).  
270 These phenomenon indicated that nitrate as nitrogen source when its  
271 concentration achieved a certain value might inhibit the growth of  
272 methanotrophs. According to the substrate inhibition theory (Muchandani

273 and Luong, 1989), an increase in the substrate concentration could cause  
274 an alteration in the cell metabolism such as an overproduction of a  
275 molecule by one pathway which results in the feedback inhibition of a  
276 second related pathway. Thus the nitrate metabolism pathway of ZR1 was  
277 further explored.

### 278 3. The formulation of ammonium, and its inhibition effect to ZR1

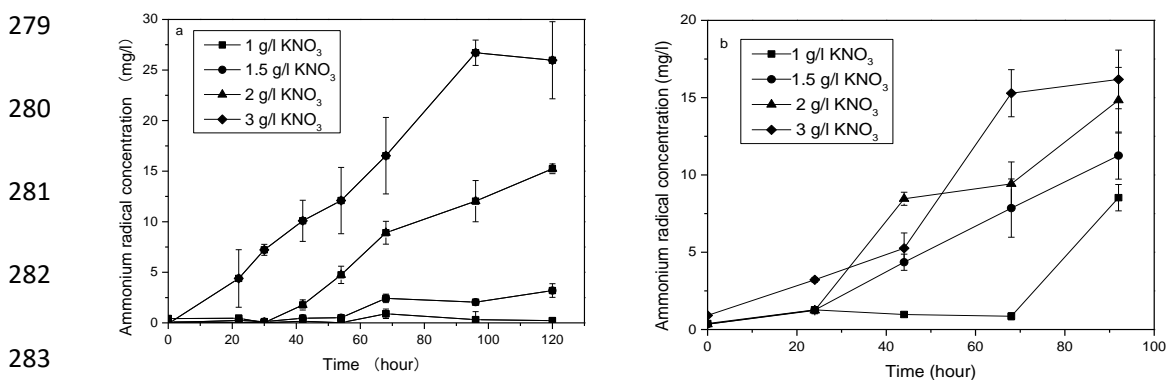

284 Figure.3 Ammonium accumulation of ZR1 in the fermentation broth with  
285 different initiate nitrate concentration from methanol and methane

286 Considering the nitrate metabolism pathway of methanotrophs, nitrogen  
287 metabolism intermediate  $\text{NH}_4^+$  was supposed to be accumulated during  
288 the process. Thus ammonium concentration in the fermentation broth was  
289 analyzed during the fermentation process of ZR1 from methane and  
290 methanol. According to Figure 3, the concentration of  $\text{NH}_4^+$  in the  
291 fermentation broth grew higher and higher during the fermentation  
292 process, which indicated that  $\text{NH}_4^+$  might accumulated accompanied with  
293 the growth of ZR1 when excess nitrate were supplied. With the increasing  
294 concentration of nitrogen source, the starting time of  $\text{NH}_4^+$  accumulation

295 has been moved up. Meanwhile the final concentration of  $\text{NH}_4^+$  increased  
 296 with the increase of the initial concentration of  $\text{KNO}_3$ . With 3 g/l of  
 297  $\text{KNO}_3$ , the final accumulated  $\text{NH}_4^+$  achieved 25 mg/l with methanol as  
 298 carbon sources and 16 mg/l with methane as carbon source. According to  
 299 Fig. 1,  $\text{NH}_4^+$  was supposed to be an inhibitor of the growth of ZR1. The  
 300 accumulated  $\text{NH}_4^+$  during the growth process of ZR1 might inhibit the  
 301 growth of ZR1. Thus the effect of  $\text{NH}_4^+$  on the growth of ZR1 was further  
 302 analyzed.

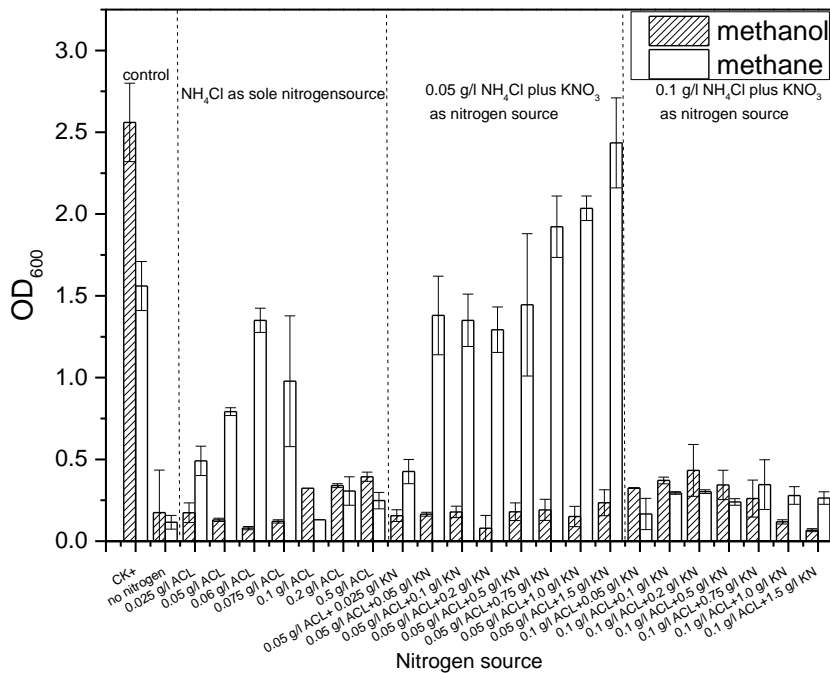

303  
 304 Figure. 4 Effect of Ammonium on the growth of ZR1 from methanol and  
 305 methanol.  
 306 ACL,  $\text{NH}_4\text{Cl}$ ; KN,  $\text{KNO}_3$ ;  
 307 Growths of ZR1 with  $\text{NH}_4\text{Cl}$  as sole nitrogen source or with both  $\text{NH}_4\text{Cl}$   
 308 and  $\text{KNO}_3$  at different concentrations were investigated. It was found that,

309 when  $\text{NH}_4\text{Cl}$  were used as the mono-nitrogen sources, cell growth of ZR1  
310 first rise up with the going up of the  $\text{NH}_4\text{Cl}$  concentration, the highest cell  
311 growth achieved 1.5 when  $\text{NH}_4\text{Cl}$  achieved 0.05, and then growth of ZR1  
312 from methane decreased when the initial  $\text{NH}_4\text{Cl}$  concentration growing  
313 higher, and  $\text{OD}_{600}$  of ZR1 with  $\text{NH}_4\text{Cl}$  at 0.1-0.5 g/l only achieved 0.42,  
314 much lower than the control (with 1 g/l  $\text{KNO}_3$  as nitrogen source). When  
315 1 g/l of  $\text{KNO}_3$  with addition of 0.05 g/l of  $\text{NH}_4\text{Cl}$  was used as nitrogen  
316 sources, the highest cell density of ZR1 from methane achieved 2.5, much  
317 higher than control. While the highest cell density of ZR1 from methanol  
318 only achieved 0.42 under the same condition. When 1 g/l of  $\text{KNO}_3$  with  
319 addition of 0.1 g/l of  $\text{NH}_4\text{Cl}$  ( $\text{NH}_4^+$  34 mg/l, 1.86 mmol/l) was used as  
320 nitrogen sources, the highest cell density of ZR1 only achieved 0.7 with  
321 methane and 0.8 with methanol. These results showed that, with the  
322 existence of  $\text{KNO}_3$ , growth of ZR1 from methane and methanol was  
323 inhibited by  $\text{NH}_4\text{Cl}$  at concentration higher than 0.1 g/l. Growth of ZR1  
324 from methane could resist with 0.05 g/l of  $\text{NH}_4\text{Cl}$  (0.93 mmol/l), and  
325 were strictly inhibited with 0.1 g/l of  $\text{NH}_4\text{Cl}$  (1.86 mmol/l), while growth  
326 of ZR1 from methanol were totally inhibited by 0.05 g/l of  $\text{NH}_4\text{Cl}$ , which  
327 indicated that growth of ZR1 from methanol is more sensitive to  $\text{NH}_4^+$   
328 than that from methane. And according to Figure 3 the final accumulated  
329  $\text{NH}_4^+$  with initial higher concentration of nitrate salts could achieve 25  
330 mg/l (0.89 mmol/l), which was high enough to inhibit the growth of ZR1



331 from methanol.

332 It was generally regarded that ammonium radicals were the competitive  
333 inhibitor of pMMO (He et al., 2017). In this study, ammonium was also  
334 identified to inhibit the growth of ZR1 from methanol and accumulate  
335 during the growing process. Recently, ammonium was reported to have  
336 effects on global gene expression of methane and nitrogen  
337 metabolism-related gene in methanotrophs (Dam et al., 2014). Being the  
338 nitrogen metabolic intermediate, accumulation of ammonium may have  
339 multiple effects on the growth of methanotrophs. Revealing its  
340 accumulation and assimilation mechanism is meaningful to understand  
341 the metabolism mechanism of methanotrophs.

#### 342 4. Carbon and nitrogen metabolic kinetic analysis of ZR1 from methanol

343 According to Figure 4, concentration of the accumulated  $\text{NH}_4^+$  was  
344 proportional to the initial nitrogen concentration in the fermentation broth.  
345 And the accumulation of  $\text{NH}_4^+$  might be result from the high initial  
346 nitrogen source concentration (in another words the lacking of the carbon  
347 skeleton). Thus, co-metabolism of the carbon and nitrogen and  
348 accumulation of ammonium in ZR1 with methanol as carbon source was  
349 further analyzed.

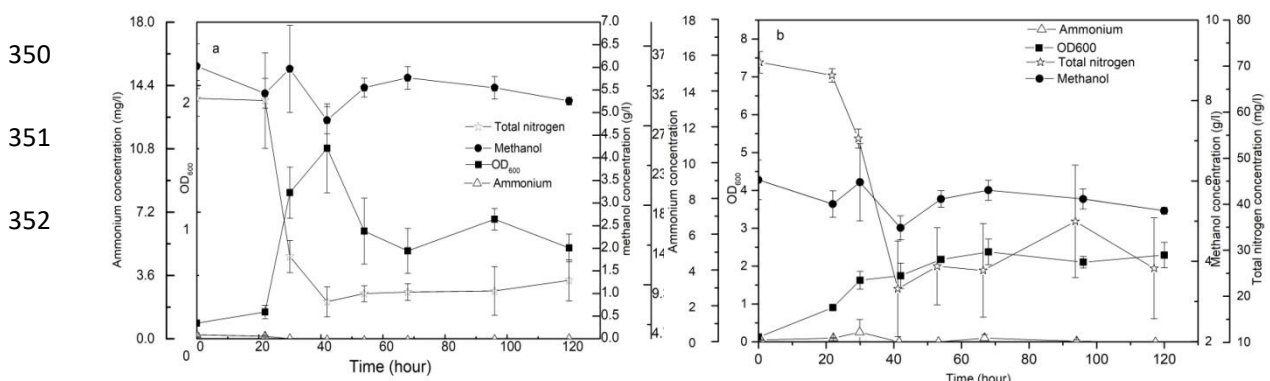

353

354

355

356

357

358

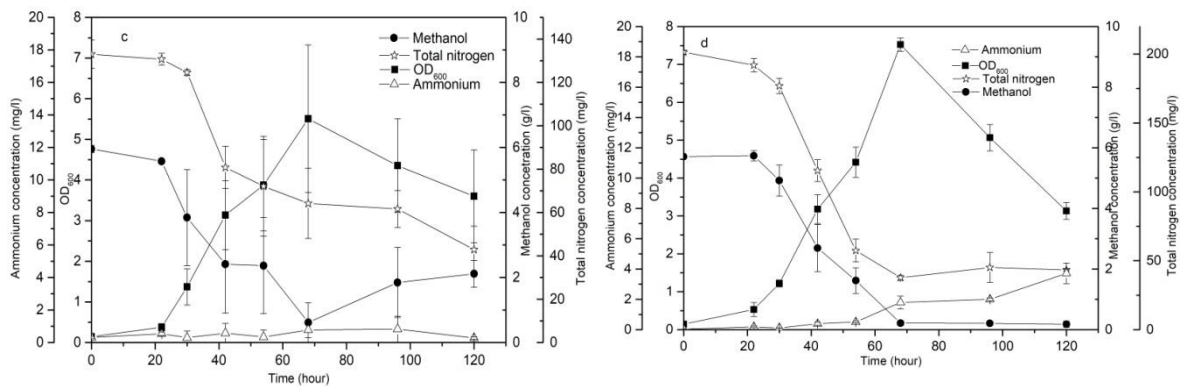

359

360

361

362

363

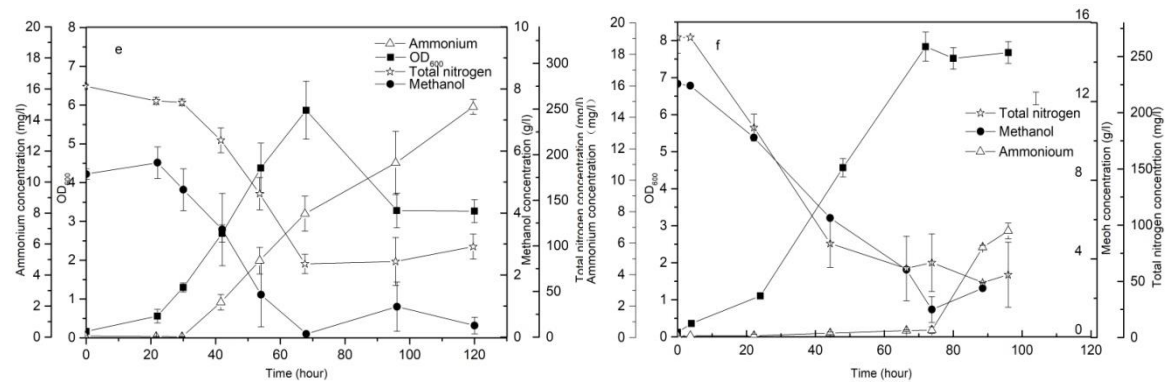

364 Figure 5. Kinetic analysis of the carbon and nitrogen metabolism of ZR1

365 from methanol. a, 6 g/l methanol and 0.2 g/l nitrate sodium; b.6g/l

366 methanol and 0.5g/l nitrate sodium; c. 6 g/l methanol and 1 g/l nitrate

367 sodium; d. 6 g/l methanol and 1.5 g/l nitrate sodium; e. 6 g/l methanol

368 and 2 g/l nitrate sodium; f. 12g/l methanol and 2g/l nitrate sodium

369 According to Figure 5, it can be found that with methanol under the same

370 concentration of 6 g/l, ammonium accumulation increased with the

371 increment of nitrogen concentration. Nonetheless, increasing the carbon

372 sources to 12 g/l (Figure 5e), the accumulated ammonium will

373 subsequently decrease. These results indicated that ammonium

374 accumulation was deduced from the imbalance of the carbon and nitrogen

375 metabolism. And according to the nitrogen test result (Figure 1, Figure 3),  
376 the accumulated ammonium could achieve 25-30 g/l which was high  
377 enough to inhibit the growth of ZR1 from methane and methanol as  
378 carbon sources.

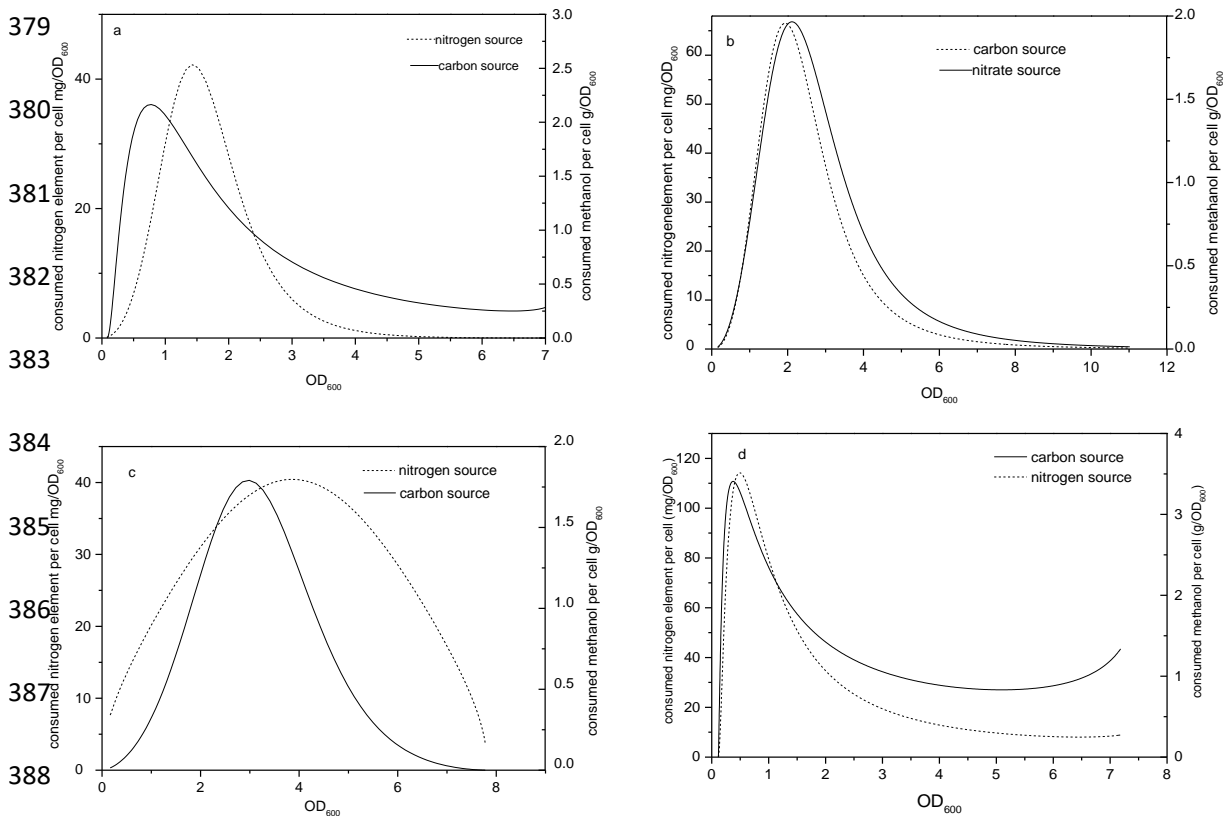

389 Figure 6. Kinetic analysis of the carbon and nitrogen metabolism to cell  
390 growth a. 6 g/l methanol and 1g/l nitrate sodium; b.6g/l methanol and  
391 1.5g/l nitrate sodium; c. 6 g/l methanol and 2 g/l nitrate sodium; d. 12g/l  
392 methanol and 2g/l nitrate sodium

393 To further compare the carbon and nitrogen metabolism pattern, specific  
394 consuming rate of the carbon and nitrogen during the growth process of  
395 ZR1 were further analyzed. According to Figure 6, it can be seen that the  
396 specific uptake rates of nitrogen and carbon dynamically changed with

397 the nitrogen-carbon ratio (NCR). High NCR will result in delayed carbon  
398 consuming, and the carbon and nitrogen uptake will keep in step when  
399 NCR fall into a suitable value.

#### 400 5. Relieving of ammonium inhibition effect by the carbon metabolites

401 According to the nitrogen sources metabolic pathway (Murrellt and  
402 Dalton, 1983; He et al., 2017; Nyerges, 2008a), methanotrophs mainly  
403 assimilate ammonium through the glutamine synthase/ glutamine  
404 2-oxo-glutarate amino transferase (GS-GAGOT) and alanine  
405 dehydrogenase (ALAD) pathways. To further confirm that accumulation  
406 of  $\text{NH}_4^+$  was derived from the shortness of the carbon skeleton, several  
407 carbon metabolic mediates pyruvate, malic acid, citrate acid,  $\alpha$ -KG  
408 which are related with the nitrogen metabolism were added to the  
409 ammonium accumulation samples (Figure. 7). According to Figure 7,  $\alpha$   
410 -KG and glutamate were the most effective carbon metabolic mediates in  
411 relieving of the  $\text{NH}_4^+$  inhibition effect with methane as carbon sources.  
412 However, with methanol as carbon source only  $\alpha$ -KG could effectively  
413 relieve the inhibition effect of  $\text{NH}_4^+$  on the growth of ZR1. Carbon  
414 metabolic mediates upstream or downstream of  $\alpha$ -KG, has small  
415 relieving effect on  $\text{NH}_4^+$  inhibition. It was also found that, direct supply of  
416 carbon skeleton such as pyruvate, citric acid,  $\alpha$ -KG, glutamate or malic  
417 acid have somewhat inhibit effect on the growth of ZR1 from methanol.  
418 Meanwhile,  $\alpha$ -KG and glutamate were found to have stimulate effect on

419 the growth of ZR1 from methane.

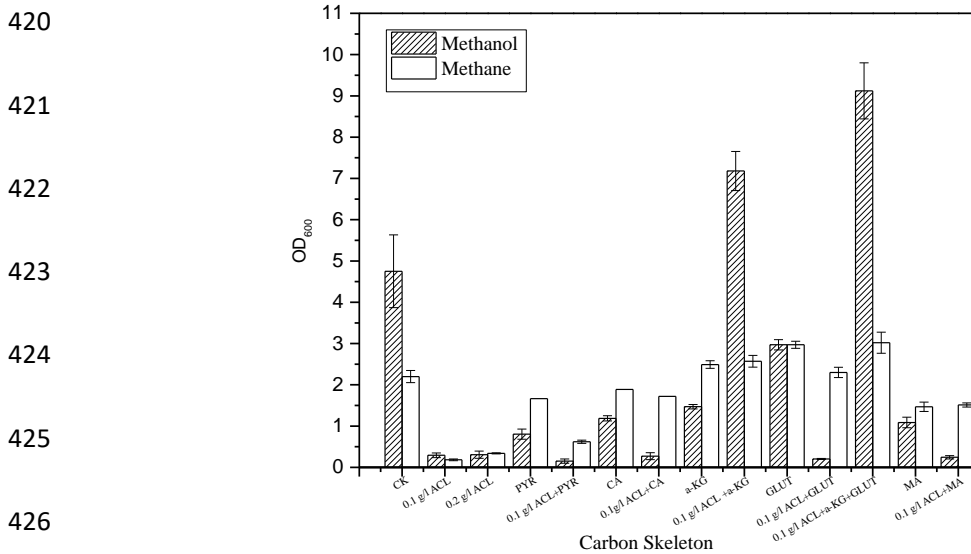

427 Figure 7. Relieve Effect of the carbon skeleton to ammonium inhibition

428 CK: control; ACL, NH<sub>4</sub>Cl; PYR, pyruvate; CA, citrate acid; α-KG, α

429 -ketoglutaramate ; GLUT, glutamate; MA, malic acid;

430 It means that, ZR1 may utilize different carbon and nitrogen metabolic

431 mechanism to balance the carbon and nitrogen metabolism. Nonetheless,

432 α-KG play more important role in assimilation of the nitrogen metabolic

433 intermediate ammonium.

434 6. Transcript level analysis the carbon and nitrogen metabolism in ZR1

435 with the accumulation of ammonium

436 According to the nitrogen metabolism pathway of microorganisms, many

437 studies indicated that, ammonia is a competitive inhibitor of pMMO,

438 which deduced the inhibition effect of methanotrophs from methane.

439 However, this study also identified the inhibition effect of NH<sub>4</sub><sup>+</sup> on ZR1

440 with methanol as carbon source. So, besides the competitive inhibition

441 effect of MMO,  $\text{NH}_4^+$  as a nitrogen metabolism intermediate may have  
442 multiple complex effects on the metabolic pathway of methanotrophs.  
443 Thus transcript level analysis of the genes relevant with carbon and  
444 nitrogen metabolism in ZR1 was carried out by qPCR.  
445 Ammonium mainly transferred to the C skeletons of pyruvate or  
446 intermediates of citric acid cycle (glycolytic) and others to form amino  
447 acid. Most amino acid participate in transamination reactions with TCA  
448 cycle mediate such as oxaloacetate, or  $\alpha$ -ketoglutarate to form aspartate,  
449 or glutamate, respectively, and the  $\alpha$ -KG corresponding to the original  
450 ammonium assimilation. Based on the genomic analysis result of ZR1,  
451 besides the ALAD and GS/GOGAT pathway, another special ammonium  
452 assimilation mechanism the Glycine synthase system may exist and  
453 function in methanotrophs(Figure 8). In this study, the GS-GAGOT,  
454 ALAD, and Glycine synthesis system on behalf of three main pathways  
455 of the ammonium assimilation were studied by qPCR, the data quality of  
456 the qPCR result was presented in supplementary Table 1.  
457 E-supplementary data of this work can be found in online version of the  
458 paper. The relative expression fold of the target genes was listed in Table  
459 2.

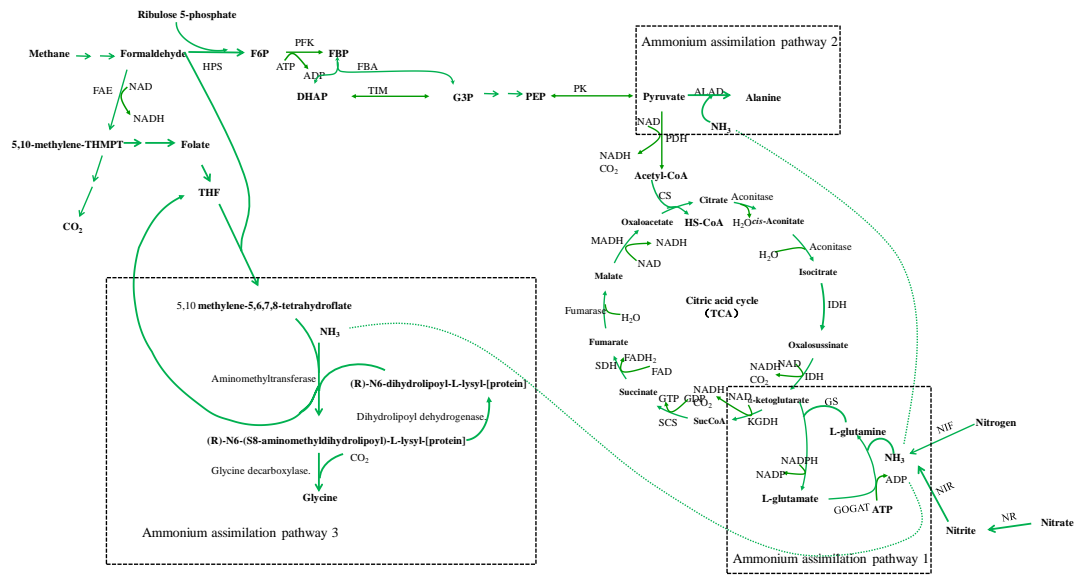

460

461

Figure 8. Nitrogen metabolism pathway of ZR1

462 HPS:3-hexulose-6-phosphate synthase, DHAP, Dihydroxyacetone phosphate; F6P,

463 Fructose-6-phosphate; FBP, Fructose- 1, 6 –bisphosphate; G3P, Glyceraldehyde

464 3-phosphate; PEP, Phosphoenolopyruvate; SucCoA, Succinyl-CoA; TIM,

465 Triosephosphate isomerase; GAPD, Glyceraldehyde 3-phosphate dehydrogenase; PK,

466 pyruvate kinase; PFK , Phosphofructose kinase; CS, Citrate synthase; IDH, Isocitrate

467 dehydrogenase; KGDH, Ketoglutarate dehydrogenase; SCS, Succinyl-CoA synthetase;

468 SDH, Succinate dehydrogenase; MDH, Malate dehydrogenase; GS, Glutamine

469 synthetase; GOGAT, Glutamate synthase; cd1 NIRs, Cytochrome cd1 nitrite reductase;

470 ALAD, Alanine dehydrogenase; NIF, Nitrogenase; FAE, Formaldehyde activating enzyme;

471 Nitrogen assimilation pathway 1:

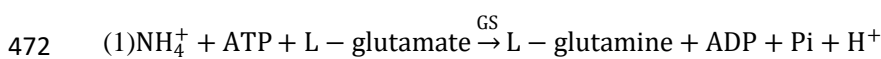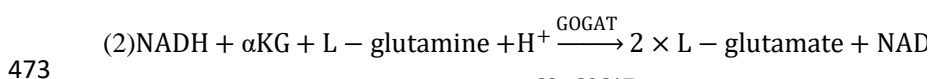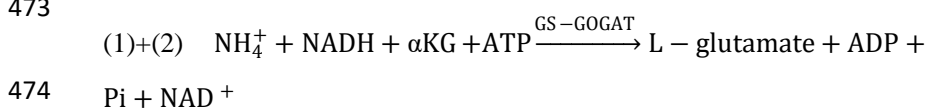

475 Nitrogen assimilation pathway 2:

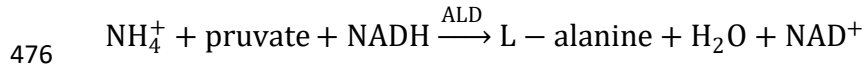

477 Nitrogen assimilation pathway 3:

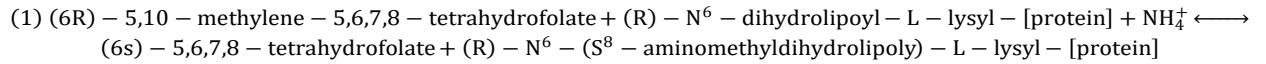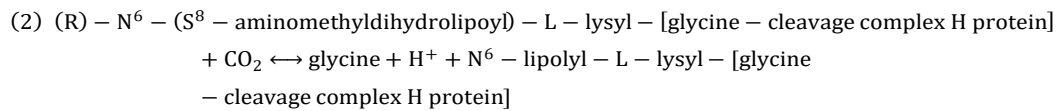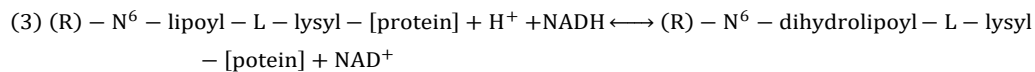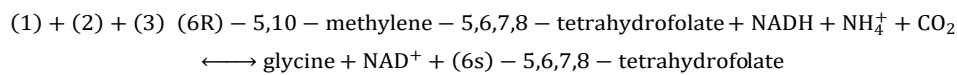

478

479 Direction 1 is catalyzed by two enzymes, glutamine synthase and  
 480 glutamine 2-oxo-glutarate amino transferase. Direction 2 is catalyzed by  
 481 the alanine dehydrogenase. Direction 3 is catalyzed by the Glycine  
 482 synthesis system.

483 Table 2. Relative expression level of the genes concerning nitrogen and  
 484 carbon metabolism

|             |                                  | Mean fold change in gene expression of samples |                  |                     |                                          |                      |                  |                     |
|-------------|----------------------------------|------------------------------------------------|------------------|---------------------|------------------------------------------|----------------------|------------------|---------------------|
| genes       | protein                          | N <sub>control</sub>                           | N <sub>ACL</sub> | N <sub>NCL-KG</sub> | M <sub>control-N<sub>control</sub></sub> | M <sub>control</sub> | M <sub>ACL</sub> | M <sub>ACL-KG</sub> |
| <i>glnA</i> | Glutamine synthase               | 1                                              | 1.92             | 15.73               | 0.69                                     | 1.00                 | 0.89             | 1.34                |
| <i>gltB</i> | Glutamate synthase large subunit | 1                                              | 7.48             | 12.64               | 42.38                                    | 1.00                 | 0.45             | 0.12                |
| <i>alaD</i> | Alanine dehydrogenase            | 1                                              | 30.84            | 17.84               | 25.07                                    | 1.00                 | 0.48             | 0.08                |
| <i>gcvT</i> | Aminomethyltransferase           | 1                                              | 19.08            | 2.96                | 1.56                                     | 1.00                 | 0.95             | 2.17                |
| <i>nir</i>  | Nitrite reductase                | 1                                              | 8.74             | 1.93                | 2.01                                     | 1.00                 | 0.48             | 0.92                |



|            |                                 |   |       |      |      |      |      |      |
|------------|---------------------------------|---|-------|------|------|------|------|------|
| <i>nif</i> | Nitrogenase                     | 1 | 4.59  | 4.14 | 2.15 | 1.00 | 0.50 | 0.92 |
| <i>fae</i> | Formaldehyde activating enzyme  | 1 | 4.32  | 2.94 | 2.99 | 1.00 | 1.07 | 1.04 |
| <i>hps</i> | 3-hexulose-6-phosphate synthase | 1 | 13.30 | 2.53 | 5.70 | 1.00 | 1.42 | 0.75 |
| <i>pdh</i> | Pyruvate Dehydrogenase          | 1 | 1.66  | 1.35 | 0.05 | 1.00 | 1.88 | 2.06 |
| <i>cs</i>  | Citrate synthase                | 1 | 1.15  | 1.52 | 8.32 | 1.00 | 1.24 | 1.21 |

485  $N_{\text{control}}$ , Samples cultured with methane;  $N_{\text{ACL}}$ , Samples cultured with  
 486 methane under 0.1 g/l  $\text{NH}_4\text{Cl}$  condition;  $N_{\text{ACL-KG}}$ , Samples cultured with  
 487 methane under 0.1 g/l  $\text{NH}_4\text{Cl}$  and 0.3 g/l  $\alpha$ -KG;  $M_{\text{control}}$ , Samples  
 488 cultured with methanol;  $M_{\text{ACL}}$ , Samples cultured with methanol under 0.1  
 489 g/l  $\text{NH}_4\text{Cl}$  condition;  $M_{\text{ACL-KG}}$ , Samples cultured with methanol under 0.1 g/l  
 490  $\text{NH}_4\text{Cl}$  and 0.3 g/l  $\alpha$ -KG;

491 According to Table 2, with methane as carbon source, when 0.1 g/l  
 492 ammonium accumulated, the *alaD* and *gcvT* gene expression levels were  
 493 30.84 and 19.08 times higher than the control, while the genes *glnA* and  
 494 *gltB* which responsible for the assimilation of  $\text{NH}_4^+$  with the  $\text{C}_5$  substrate  
 495 expressed 1.92 and 7.48 times higher than that of the control. This  
 496 indicated that ZR1 may rely more on the  $\text{C}_3$  carbon skeleton to assimilate  
 497 the extra  $\text{NH}_4^+$ . Another interesting phenomenon is the high expression  
 498 level of *gcvT* gene (19.08) when ZR1 confronted with 0.1g/l of  $\text{NH}_4\text{Cl}$   
 499 with methane as carbon source and its expression level returned to 2.96

500 when the C5 carbon skeleton was replenished. According the third  
501 direction of nitrogen assimilation, this reaction consumes much  
502 5,10-methylene-5,6,7,8-tetrahydrofolate which is a derivative of C1  
503 substrate. And the exhaustion of the C1 and C3 substrate may reduce the  
504 flux distribution of the downstream carbon metabolic pathway and cause  
505 the worse growth of ZR1 when high concentration ammonium appeared.  
506 Furthermore,  $\text{NH}_4^+$  accumulation may also induce the expression of the  
507 *hps* gene which is responsible for the assimilation of C1 substrate.  
508 Surprisingly, expression level of genes concerns the nitrogen assimilation  
509 and formaldehyde oxidization was also up-regulated 4-8 times. On the  
510 other hand, with methanol as carbon sources, ZR1 possess a relative high  
511 expression background with the *gltB*, *alaD*, *hps* and *cs* genes. And genes  
512 changed slightly with  $\text{NH}_4^+$  accumulation in comparison with control.  
513 However, if considering the relative gene expression level of the samples  
514 with methanol as carbon sources in comparison with methane, the C5 and  
515 C3 carbon skeleton assimilation gene *gltB* and *alaD* of ZR1 still kept  
516 19.07 and 12.03 times higher than the methane control. Thus, when  
517 confronted with high ammonium concentration, ZR1 may mainly  
518 assimilate  $\text{NH}_4^+$  through pathway 1 and 2. Meanwhile, decreasing the *nir*  
519 and *nif* gene expression level to decrease the formulation of ammonium  
520 might be the main strategy employed by ZR1. With the replenishment of  
521 the C5 skeleton, the expression level of ammonium assimilation gene

522 *gltB* and *alaD* using C5 and C3 carbon skeleton decreased to 0.12 and  
523 0.08, and the nitrate and nitrogen reduction gene return to normal level.  
524 However, the *gcvT* gene in the third ammonium assimilation direction  
525 expressed 2 times higher.

526 Nitrate and its metabolic intermediate were found to have multiple  
527 functions for the primary metabolism in biology (Stitt, 1999; Commichau  
528 et al., 2006; Cueto et al., 2016). Ammonium was found to be an important  
529 signal molecular to affect the methane and nitrogen metabolism in  
530 methanotrophs (Dam et al., 2014; Bodelier and Laanbroek, 2004). In this  
531 study, it was also found that, owing to the imbalance metabolism of  
532 carbon and nitrogen source, ammonium would accumulated to  
533 concentrations high enough to inhibited cell growth. High concentration  
534 ammonium will result in high level expression of several genes concerned  
535 the carbon and nitrogen metabolism.

### 536 **Conclusions:**

537 Nitrate and its metabolic intermediate were found to have multiple  
538 functions for the primary metabolism in biology (Stitt, 1999; Commichau  
539 et al., 2006; Cueto-Rojas et al., 2016). Ammonium was found to be an  
540 important signal molecular to affect the methane and nitrogen metabolism  
541 in methanotrophs (Dam et al., 2014; Bodelier and Laanbroek, 2004). In  
542 this study, it was also found that, owing to the imbalance metabolism of  
543 carbon and nitrogen source, ammonium would accumulated to

544 concentrations high enough to inhibited cell growth. High concentration  
545 ammonium will result in high level expression of several genes concerned  
546 the central carbon and nitrogen metabolism, and thus change the  
547 metabolic mode of cells.

548 First, effect of nitrogen substrate to the growth of ZR1 from methane and  
549 methanol were analyzed. Nitrate salts were proved to be the best nitrogen  
550 substrate to support the growth of ZR1 from methanol and methane as  
551 carbon source. The nitrate intermediate metabolite ammonium was found  
552 to inhibit the growth of ZR1 from methanol and methane. High nitrate  
553 concentration inhibition phenomenon has long been investigated in 1991  
554 by Park et al.(Park et al., 1991), however its inhibition mechanism in  
555 methanotrophs still lack studying. According to the substrate inhibition  
556 theory (Muchandani and Luong, 1989), the nitrate metabolic intermediate  
557 ammonium were found to accumulate, and might inhibit the growth of  
558 ZR. Kinetic study revealed that the concentration of accumulated  
559 ammonium was proportional to the original nitrate concentration in the  
560 medium. With high initiate nitrate salt, the metabolic mediates  $\text{NH}_4^+$   
561 would accumulate to more than 10 mM which was high enough to inhibit  
562 the growth of ZR1. These results indicated that worse growth of ZR1  
563 might be owing to the disequilibrium of carbon and nitrogen metabolism.  
564 Supplying carbon skeleton to assimilate extra ammonium was proven to  
565 be a suitable strategy to relieve the inhibition effect of  $\text{NH}_4^+$ . The carbon

566 skeleton replenish effect of several carbon substrate to ammonium  
567 inhibition was found to be different with methanol and methane as carbon  
568 source. However  $\alpha$ -KG was found to be the best carbon skeleton to  
569 relieve the ammonium inhibition effect. qPCR analysis indicated that,  
570 *gcvT*, *glnA*, and *alaD* genes were expressed relatively higher when ZR1  
571 confronted with the high ammonium concentration with methane as  
572 carbon source. With addition of the C5 carbon skeleton  $\alpha$ -KG, *glnA* gene  
573 expressed higher, and the *gcvT* gene decreased 8 times lower to  
574 ammonium accumulation condition, which indicated that, ZR1 may rely  
575 more on the third direction to assimilate extra ammonium. With methanol  
576 as carbon source, the *gltB* and *alaD* gene expressed at a relative high  
577 level at normal condition in comparison with methane as carbon source.  
578 When confronted the ammonium inhibition condition, ZR1 may decrease  
579 its *nir* and *nif* gene expression level and up-regulate the *hps* gene to  
580 further prevent the accumulation of ammonium.

581 In this study it was found that the nitrogen metabolic intermediate  
582 ammonium might be a signature of the nitrogen metabolism in  
583 *Methylobionas*, and induce related genes to balance the carbon and  
584 nitrogen metabolism. Besides the normal ALAD and GS/GAGOT  
585 ammonium assimilation pathway, the third Glycine synthase using the C1  
586 carbon skeleton may also actively expressed in ZR1. Methanotrophs may  
587 utilize a complex strategy to balance the carbon and nitrogen metabolism

588 according to the available carbon source. These findings are meaningful  
589 to reveal the complex coordination metabolic mechanism of nitrogen and  
590 carbon in methanotrophs. However, the ammonium signal transduction  
591 pathway of methanotrophs needs further study to reveal its induction  
592 mechanism.

### 593 **Acknowledgement:**

594 This work was supported by STS Project of the Chinese Academy of  
595 Sciences (No. KFJ-STZ-ZDTP-065), Key project of Tianjin (No.  
596 14ZCZDSY00157). Kind help extended by the graduate students Yanyun  
597 Guo, Mengdi Zhang, Lili Liu during the study are greatly appreciated.

### 598 **Conflicts of interest**

599 The authors have declared that no conflicts of interest exist.

600

### 601 **References:**

602 Bodelier PLE and Laanbroek HJ. (2004) Nitrogen as a regulatory factor  
603 of methane oxidation in soils and sediments. *FEMS Microbiology*  
604 *Ecology* 47(3): 265-277.

605 Carlsen HN, Joergensen L and Degn H. (1991) Inhibition by ammonia of  
606 methane utilization in *Methylococcus capsulatus* (Bath). *Applied*  
607 *Microbiology Biotechnology* 35: 4.

608 Commichau FM, Forchhammer K and Stulke J. (2006) Regulatory links  
609 between carbon and nitrogen metabolism. *Curr Opin Microbiol*

- 610 9(2): 167-172.
- 611 Cueto-Rojas HF, Maleki Seifar R, Ten Pierick A, et al. (2016) In vivo  
612 analysis of NH<sub>4</sub><sup>+</sup> transport and central N-metabolism of  
613 *Saccharomyces cerevisiae* under aerobic N-limited conditions.  
614 *Appl Environ Microbiol*.
- 615 Dam B, Dam S, Kim Y, et al. (2014) Ammonium induces differential  
616 expression of methane and nitrogen metabolism-related genes in  
617 *Methylocystis* sp. strain SC2. *Environ Microbiol* 16(10):  
618 3115-3127.
- 619 Dunfield P and Knowles R. (1995) Kinetics of Inhibition of Methane  
620 Oxidation by Nitrate, Nitrite, and Ammonium in a Humisol. *Appl*  
621 *Environ Microbiol* 61(8): 7.
- 622 Garg S, Clomburg JM and Gonzalez R. (2018) A modular approach for  
623 high-flux lactic acid production from methane in an industrial  
624 medium using engineered *Methylomicrobium buryatense* 5GB1. *J*  
625 *Ind Microbiol Biotechnol* 45(6): 379-391.
- 626 Guo W, Li D, He R, et al. (2017) Synthesizing value-added products from  
627 methane by a new *Methylomonas*. *J Appl Microbiol* 123(5):  
628 1214-1227.
- 629 Han B, Su T, Wu H, et al. (2009) Paraffin oil as a "methane vector" for  
630 rapid and high cell density cultivation of *Methylosinus*  
631 *trichosporium* OB3b. *Appl Microbiol Biot* 83(4): 669-677.

- 632 He R, Chen M, Ma RC, et al. (2017) Ammonium conversion and its  
633 feedback effect on methane oxidation of *Methylosinus sporium*. *J*  
634 *Biosci Bioeng* 123(4): 466-473.
- 635 Henard CA, Smith H, Dowe N, et al. (2016) Bioconversion of methane to  
636 lactate by an obligate methanotrophic bacterium. *Sci Rep* 6: 21585.
- 637 Hoefman S, Ha Dvd, Boon N, et al. (2014) Niche differentiation in  
638 nitrogen metabolism among methanotrophs with an operational  
639 taxonomic unit. *BMC Microbiology* 14: 11.
- 640 Hu A and Lu Y. (2015) The differential effects of ammonium and nitrate  
641 on methanotrophs in rice field soil. *Soil Biology and Biochemistry*  
642 85: 31-38.
- 643 Kits KD, Klotz MG and Stein LY. (2015) Methane oxidation coupled to  
644 nitrate reduction under hypoxia by the Gammaproteobacterium  
645 *Methylomonas denitrificans*, sp. nov. type strain FJG1. *Environ*  
646 *Microbiol* 17(9): 3219-3232.
- 647 Leak DJ and Dalton H. (1986) Growth yields of methanotrophs 1. Effect  
648 of copper on the energetics of methane oxidation. *Appl Microbiol*  
649 *Biot* (23): 7.
- 650 Loginova NV, Govorukhina NI and Trotsenko I. (1982) Enzymes of  
651 ammonia assimilation in bacteria with different C1-metabolic  
652 pathways. 51(1): 5.
- 653 Muchandani A and Luong JHT. (1989) Microbial inhibition kinetics



- 654 revisited. *Enzyme Microbiology Technology* 11: 8.
- 655 Murrellt JC and Dalton H. (1983) Ammonia Assimilation in  
656 *Methylococcus capsulatus* (Bath) and other Obligate  
657 Methanotrophs *Journal of General Microbiology* 129: 10.
- 658 Myung J, Kim M, Pan M, et al. (2016) Low energy emulsion-based  
659 fermentation enabling accelerated methane mass transfer and  
660 growth of poly(3-hydroxybutyrate)-accumulating methanotrophs.  
661 *Bioresour Technol* 207: 302-307.
- 662 Nyerges G. (2008) New insights into ammonia and nitrite metabolism by  
663 methanotrophic Bacteria. University of California Riverside.
- 664 Nyerges G, Han SK and Stein LY. (2010) Effects of ammonium and  
665 nitrite on growth and competitive fitness of cultivated  
666 methanotrophic bacteria. *Appl Environ Microbiol* 76(16):  
667 5648-5651.
- 668 Nyerges G and Stein LY. (2009) Ammonia cometabolism and product  
669 inhibition vary considerably among species of methanotrophic  
670 bacteria. *FEMS Microbiol Lett* 297(1): 131-136.
- 671 Park S, Hanna ML, Taylor RT, et al. (1991) Batch cultivation of  
672 *Methylosinus trichosporium* OB3b. I Production of soluble  
673 methane monooxygenase. *Biotechnol Bioeng* 38: 11.
- 674 Pfaffl MW. (2001) A new mathematical model for relative quantification  
675 in real-time RT-PCR. *Nucleic Acids Research* 29: 6.

- 676 Schnell S and King GM. (1994) Mechanistic analysis of ammonium  
677 inhibition of Atmospheric Methane Consumption in Forest Soilst.  
678 *Appl Environ Microb* 60(10): 3514-3521.
- 679 Shah NN, Hanna ML and Taylo RT. (1996) Batch cultivation of  
680 *Methylosinus trichosporium* OB3 b : V. Characterization of  
681 poly-P-hydroxybutyrate production Under methane-dependent  
682 growth conditions. *Biotechnol Bioeng* 49: 161-171.
- 683 Sonntag F, Kroner C, Lubuta P, et al. (2015) Engineering  
684 *Methylobacterium extorquens* for de novo synthesis of the  
685 sesquiterpenoid alpha-humulene from methanol. *Metab Eng* 32:  
686 82-94.
- 687 Stitt M. (1999) Nitrate regulation of metabolism and growth. *Current*  
688 *Opinion in Plant Biology* 2: 9.
- 689 Xie ZP, Xu ZN, Zheng JM, et al. (2005) Determination of ammonium  
690 nitrogen in fermentation broth through indophenol blue reaction.  
691 *Journal of Zhejiang University(Engineering Science)* 39(3): 4.
- 692 Xing XH, Wu H, Luo MF, et al. (2006) Effects of organic chemicals on  
693 growth of *Methylosinus trichosporium* OB3b. *Biochem Eng J* 31:  
694 5.
- 695 Yang M and Vousden KH. (2016) Serine and one-carbon metabolism in  
696 cancer. *Nat Rev Cancer* 16(10): 650-662.
- 697 Ye RW and Kelly K. (2012) Construction of carotenoid biosynthetic

698 pathways through chromosomal integration in methane-utilizing  
699 bacterium *Methylomonas* sp. strain 16a. *Methods Mol Biol.*  
700 Humana Press, 185-195.

701 Yu SS-F, Chen KH-C, Tseng MY-H, et al. (2003) Production of  
702 high-quality particulate methane monooxygenase in high yields  
703 from *Methylococcus capsulatus* (bath) with a hollow-fiber  
704 membrane bioreactor. *J Bacteriol* 185(20): 10.

705

706
